# Supplementary material
Source: PubMed Central journal article supplement (PMC3789865)
Supplement: NIHMS504554-supplement-8.pdf [file NIHMS504554-supplement-8.pdf]

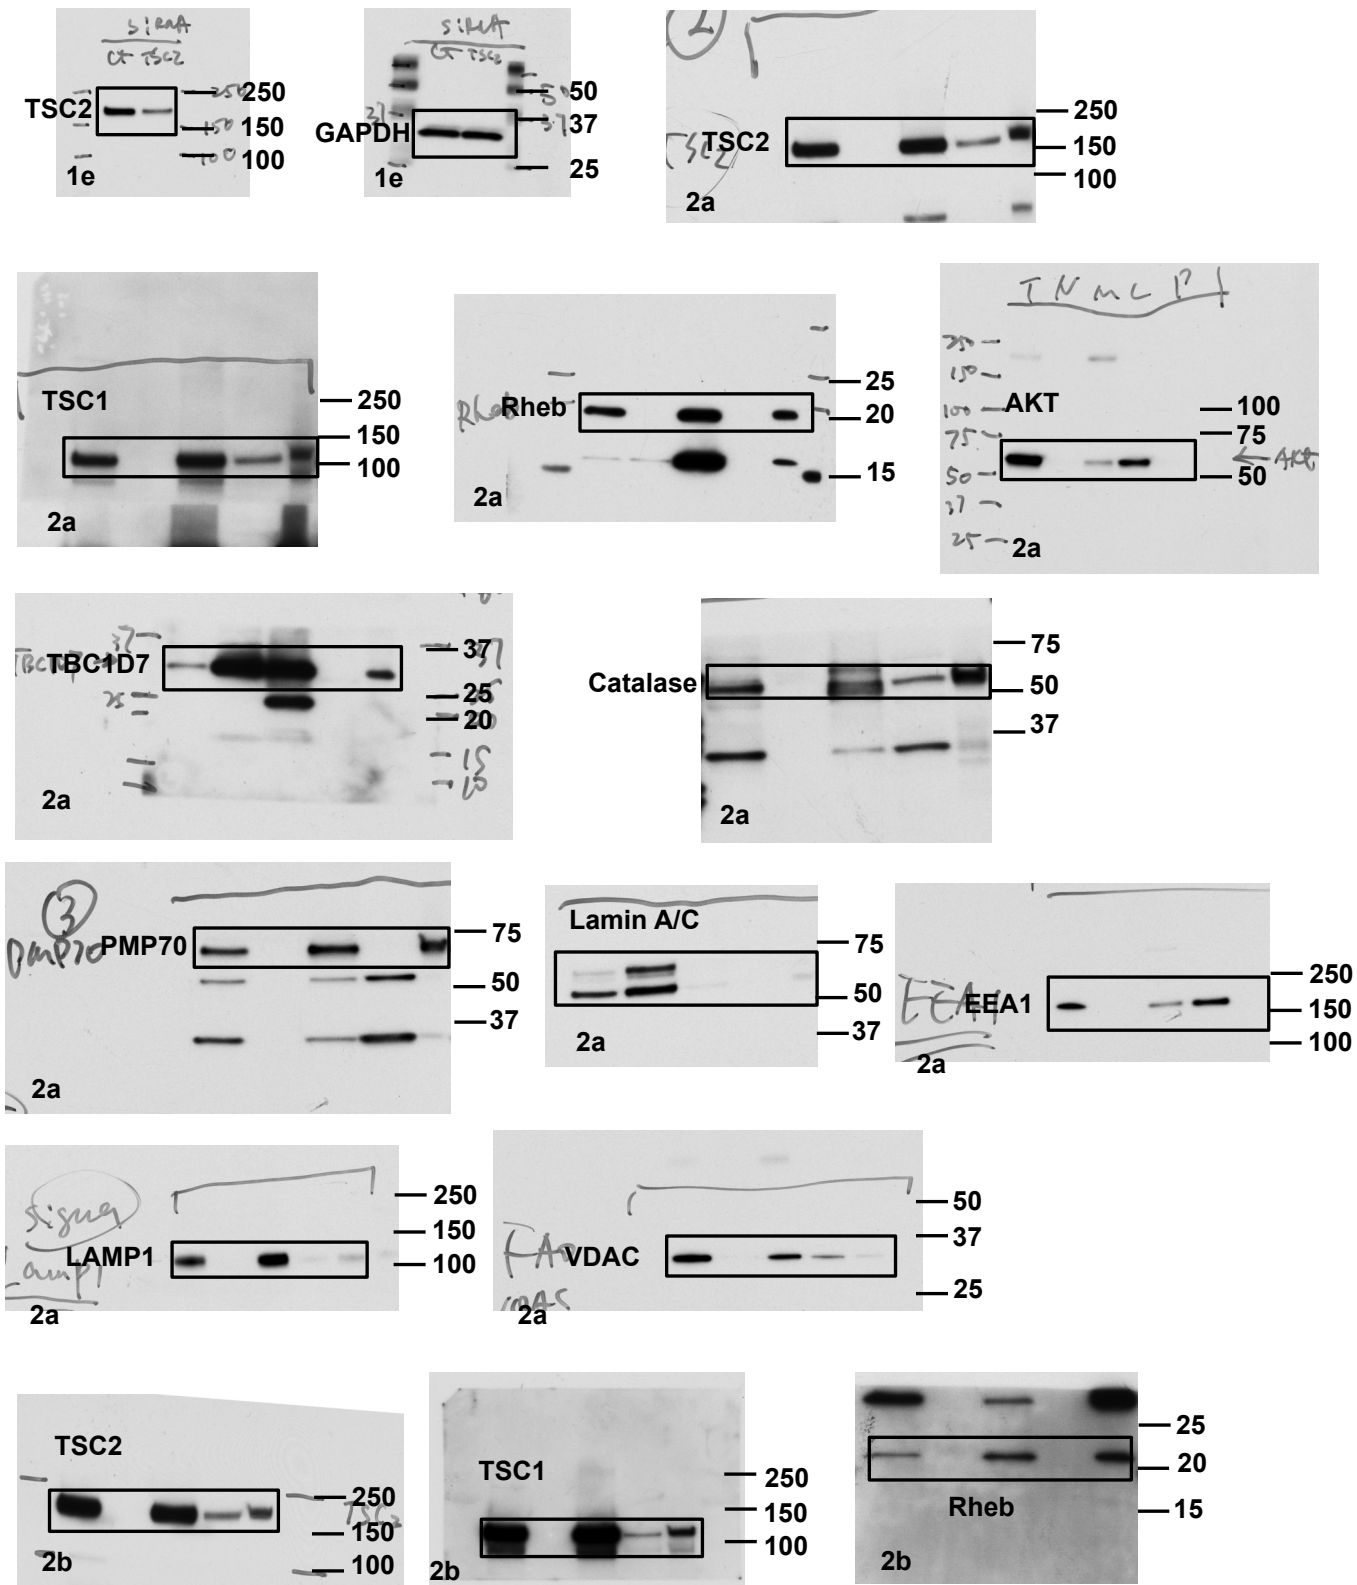

Figure S6 Original scan of Western blots. Black boxes indicate cropped region and are labeled for corresponding figure, panel and antibody

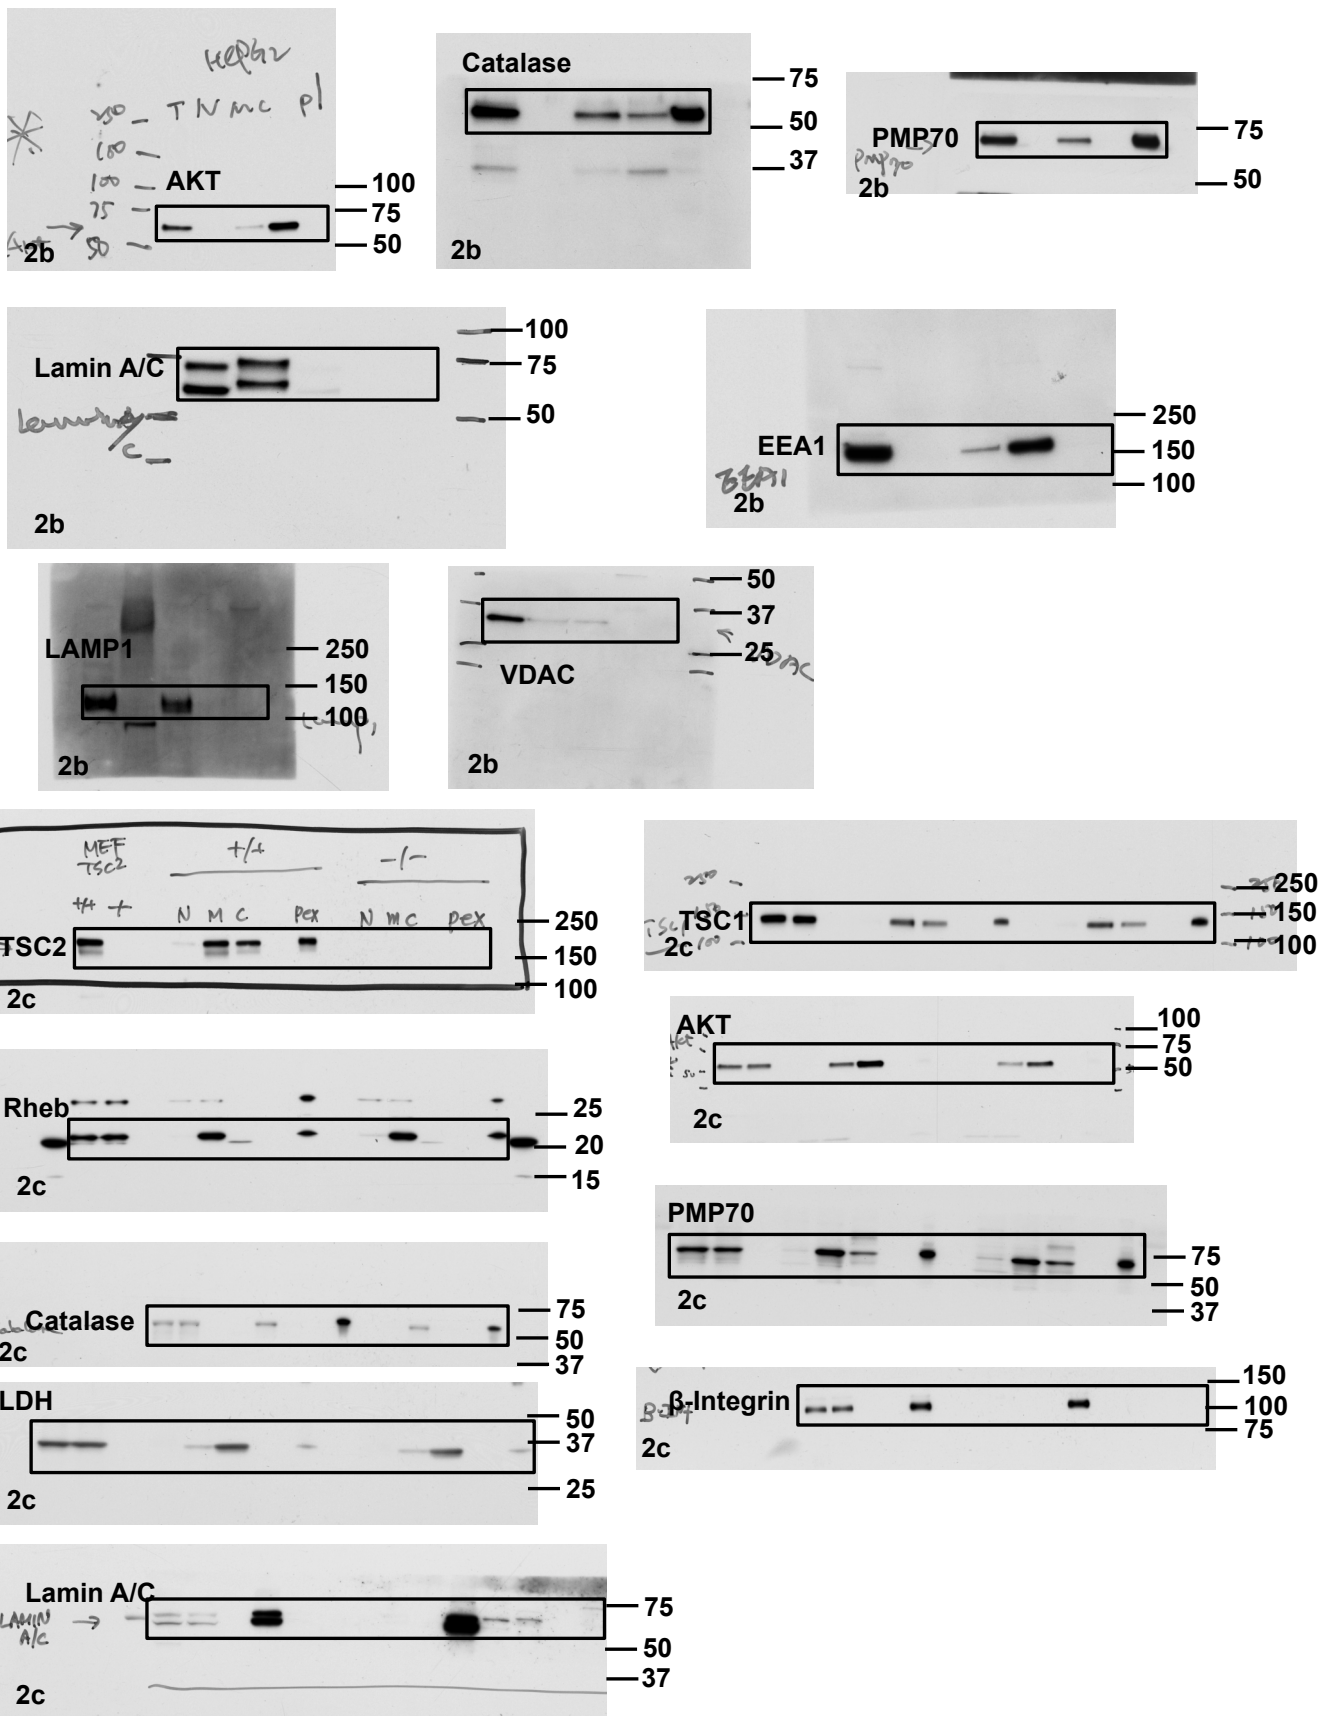

Figure S6 Continued

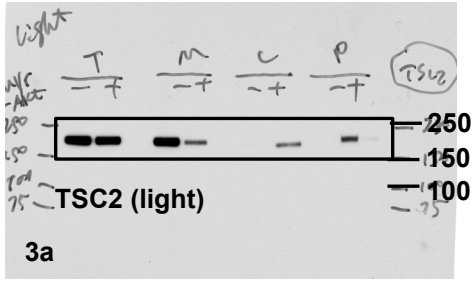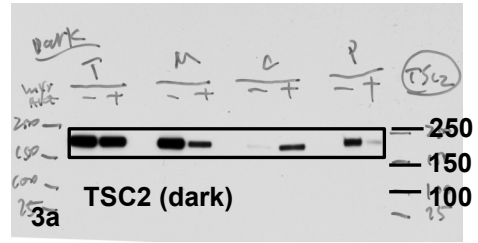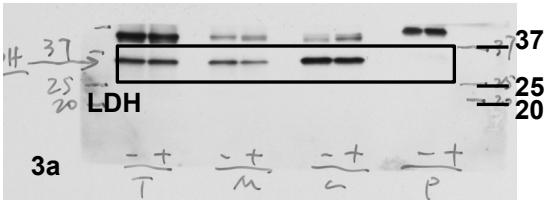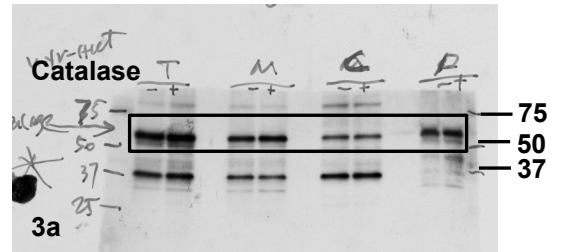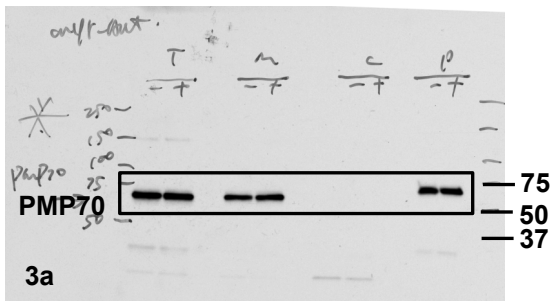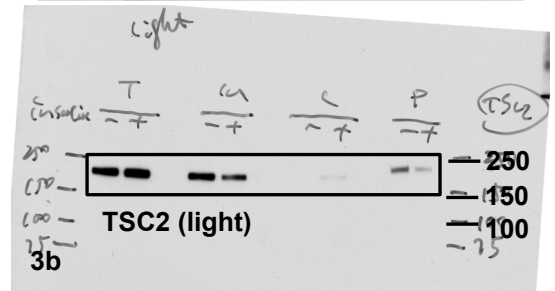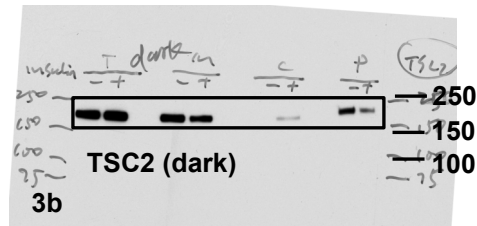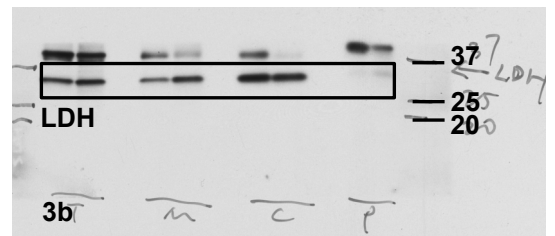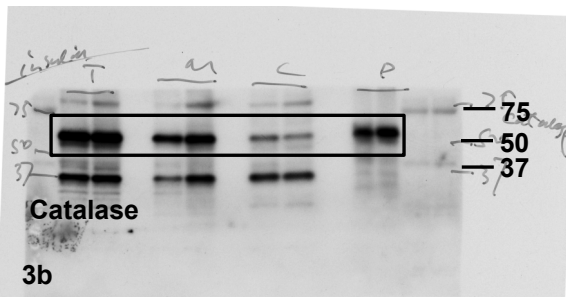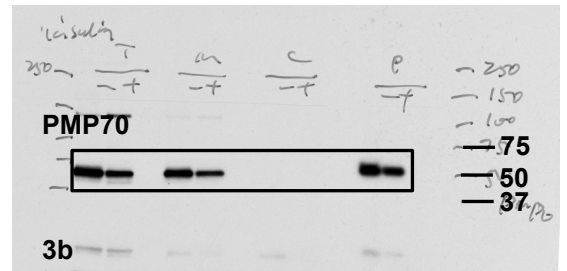

Figure S6 Continued

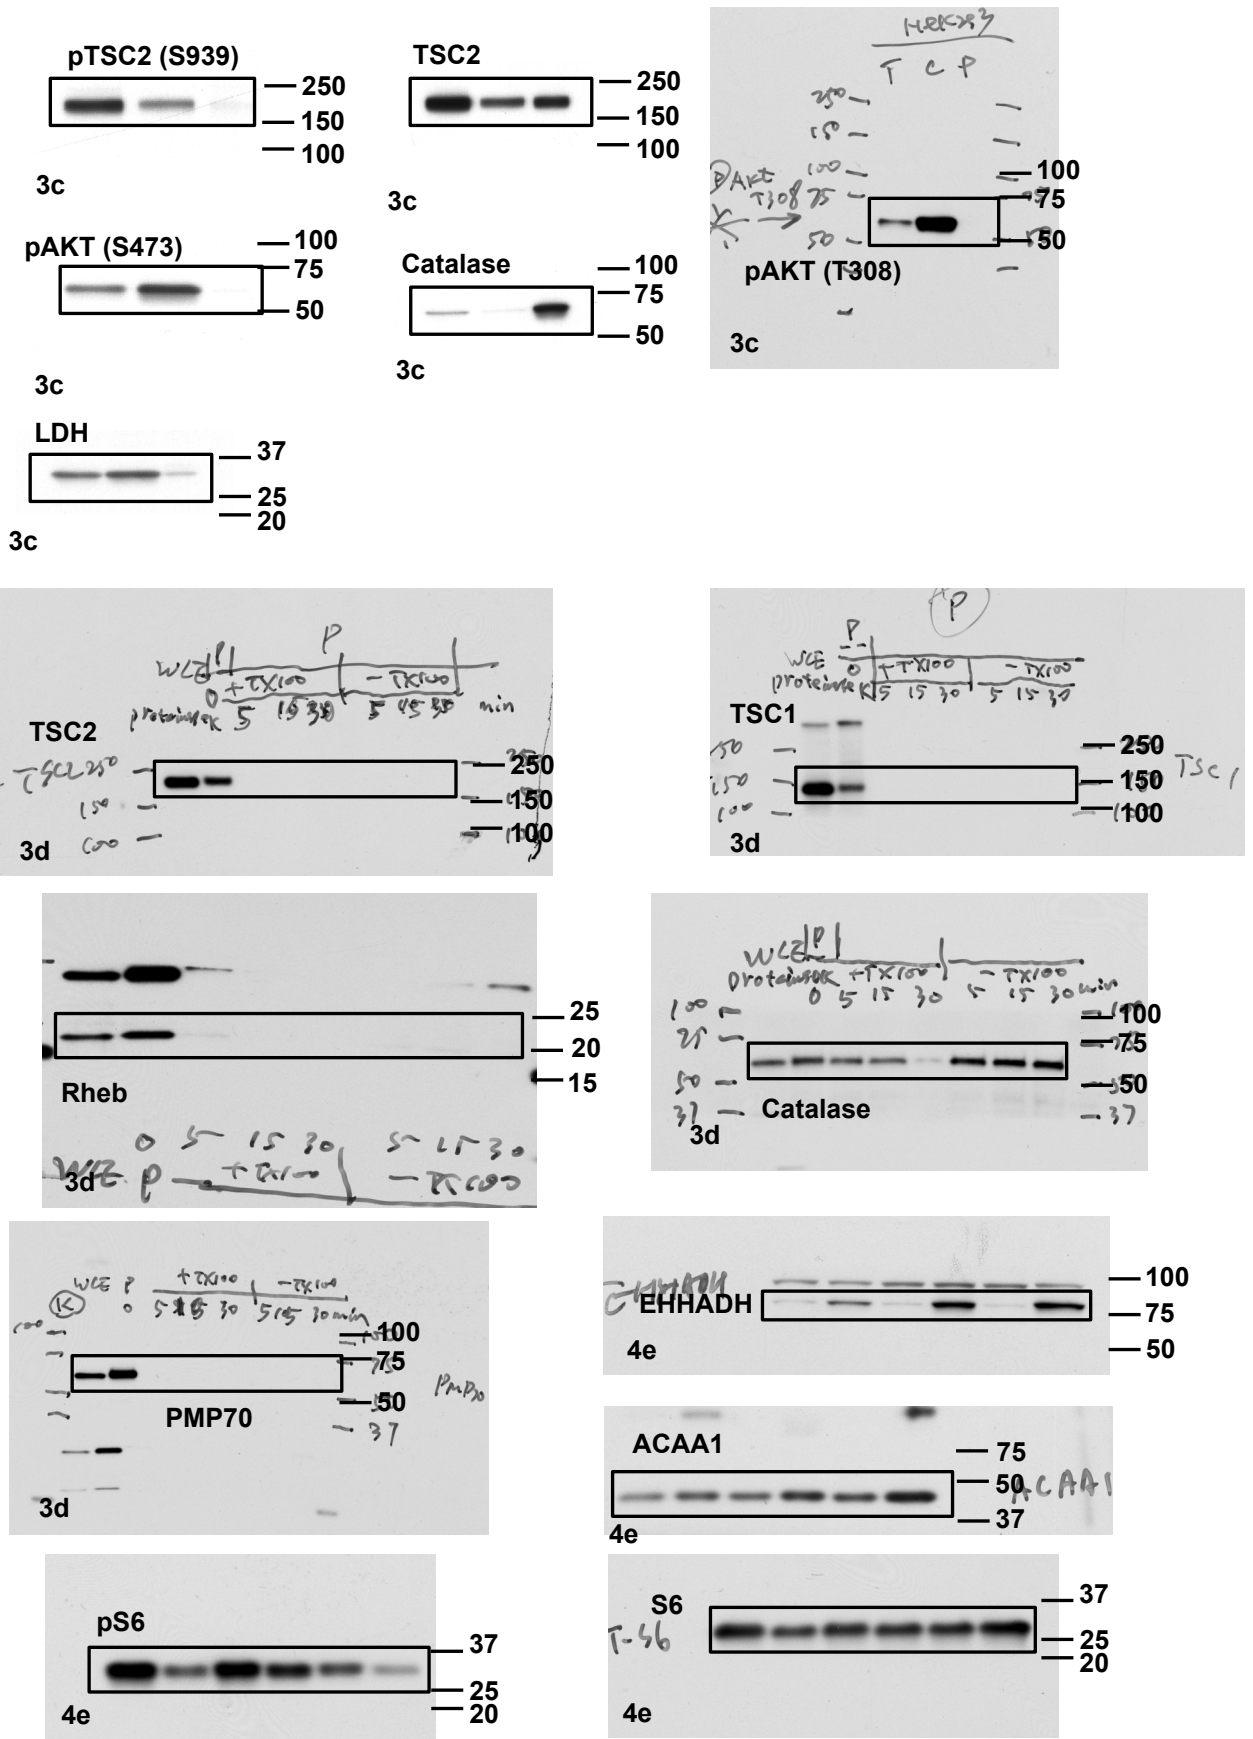

Figure S6 Continued

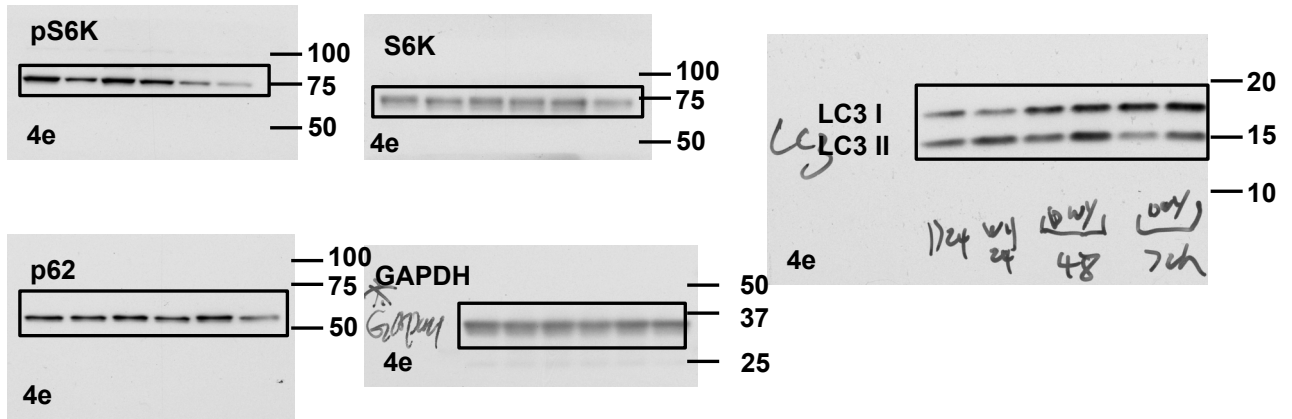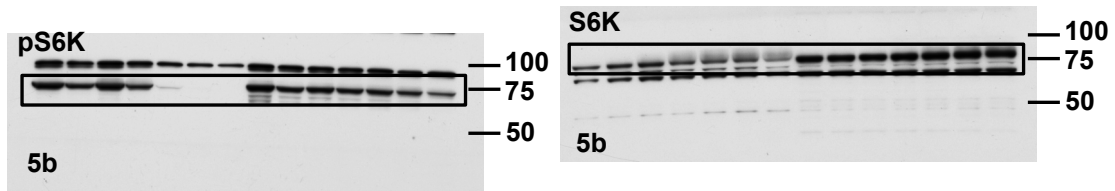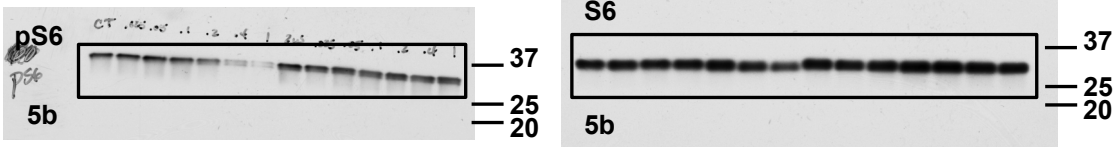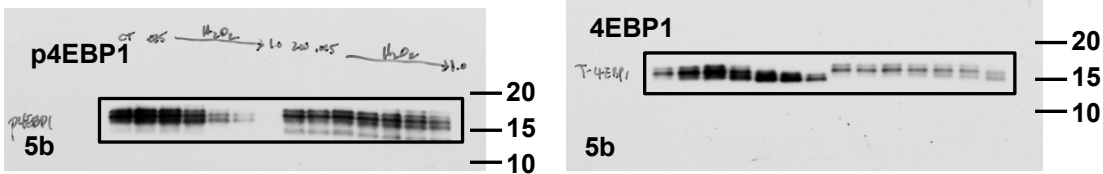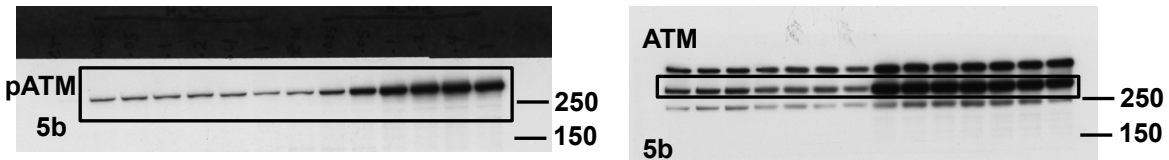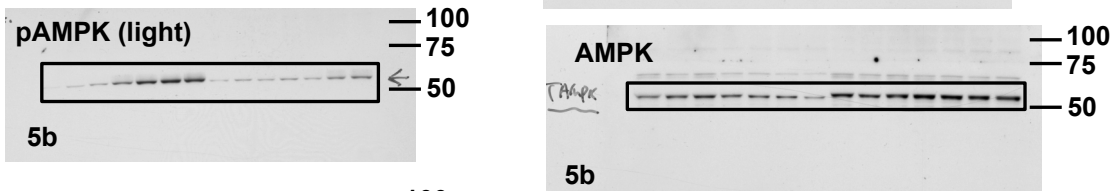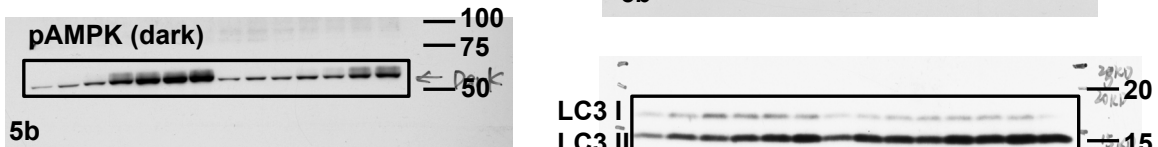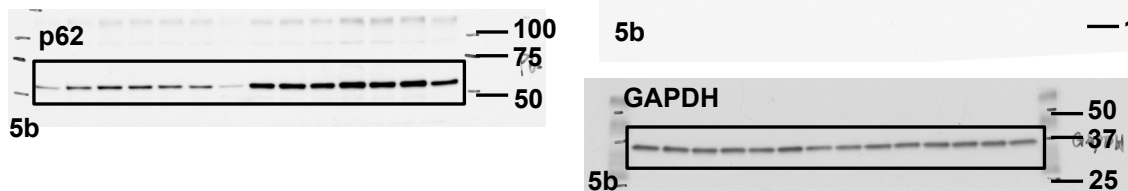

Figure S6 Continued

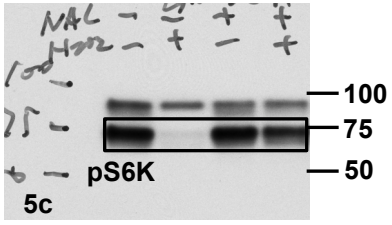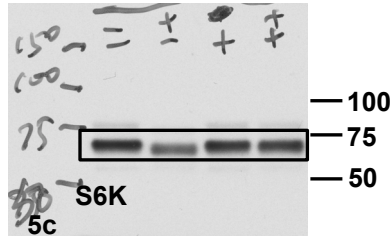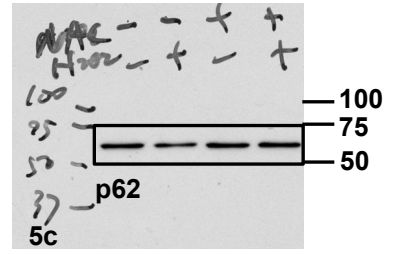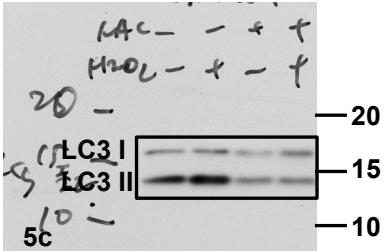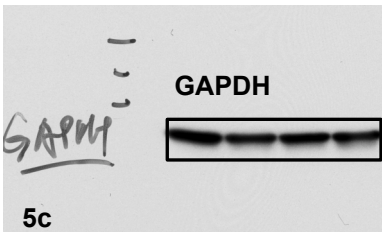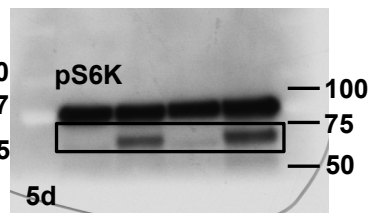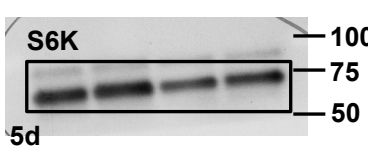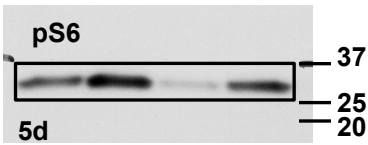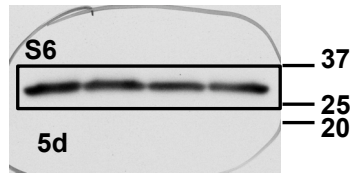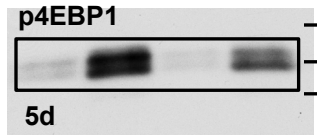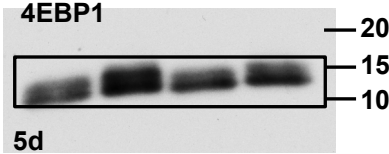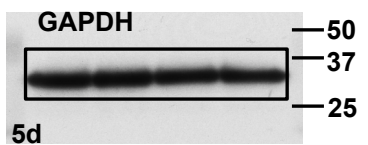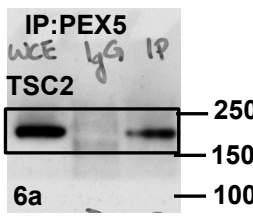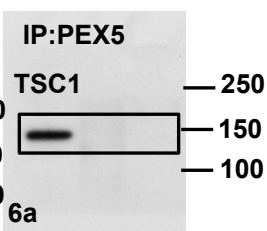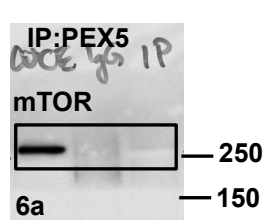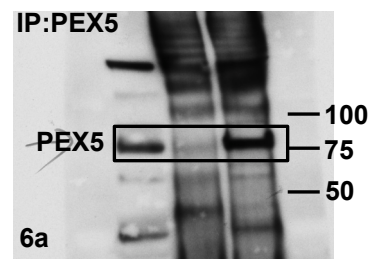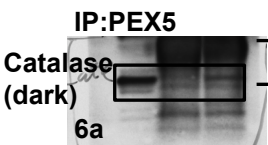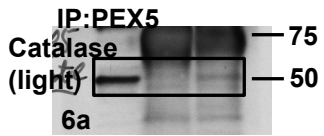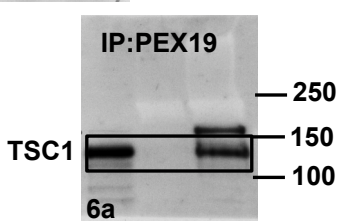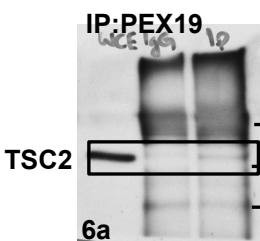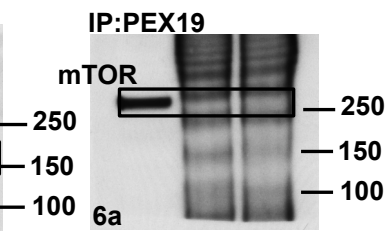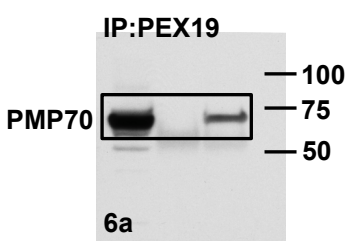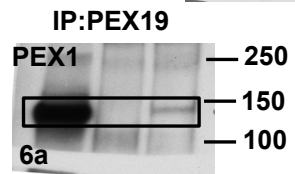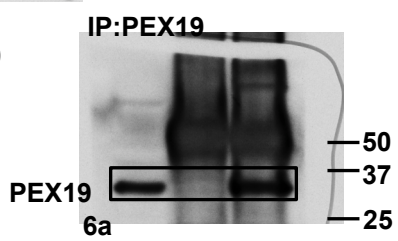

Figure S6 Continued

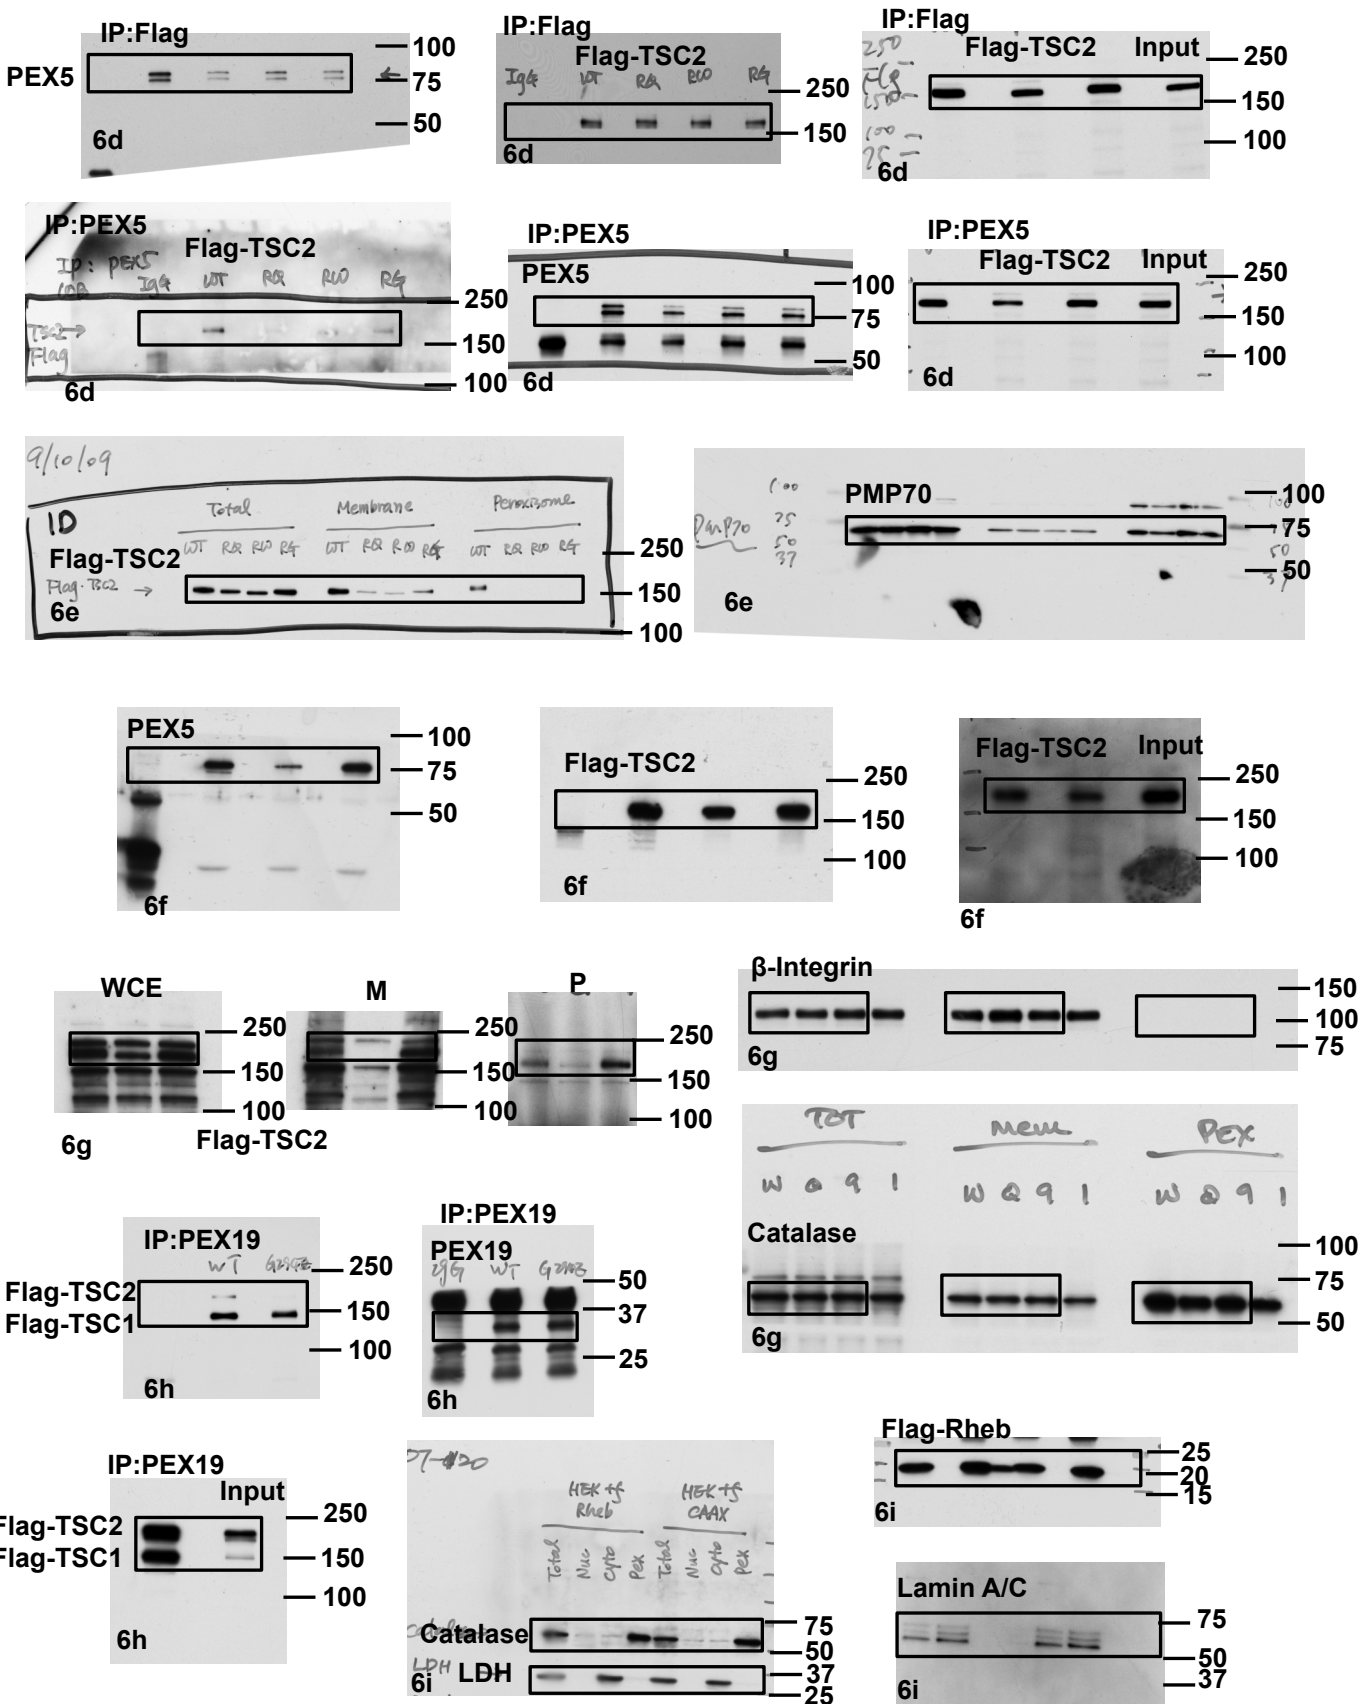

Figure S6 Continued

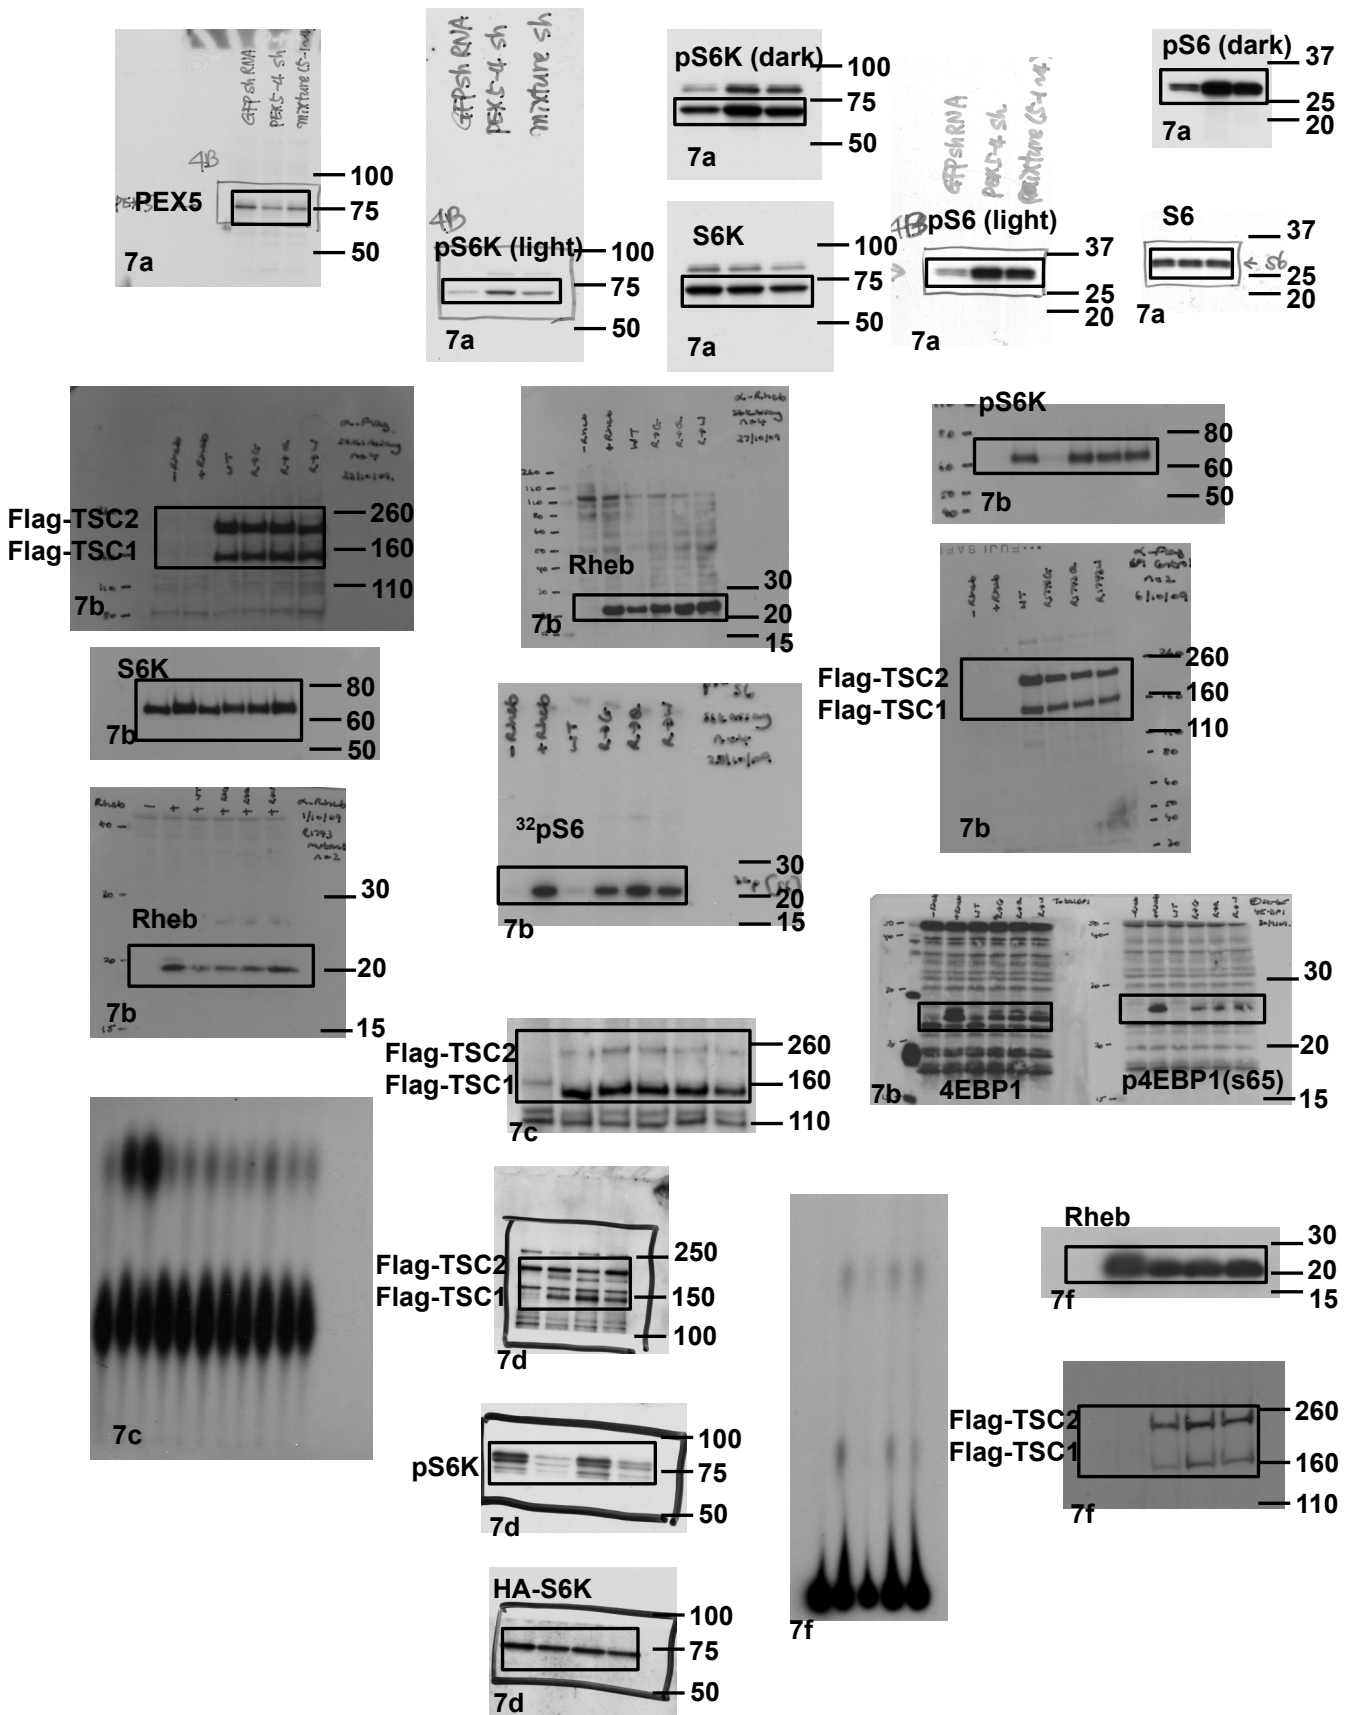

Figure S6 Continued



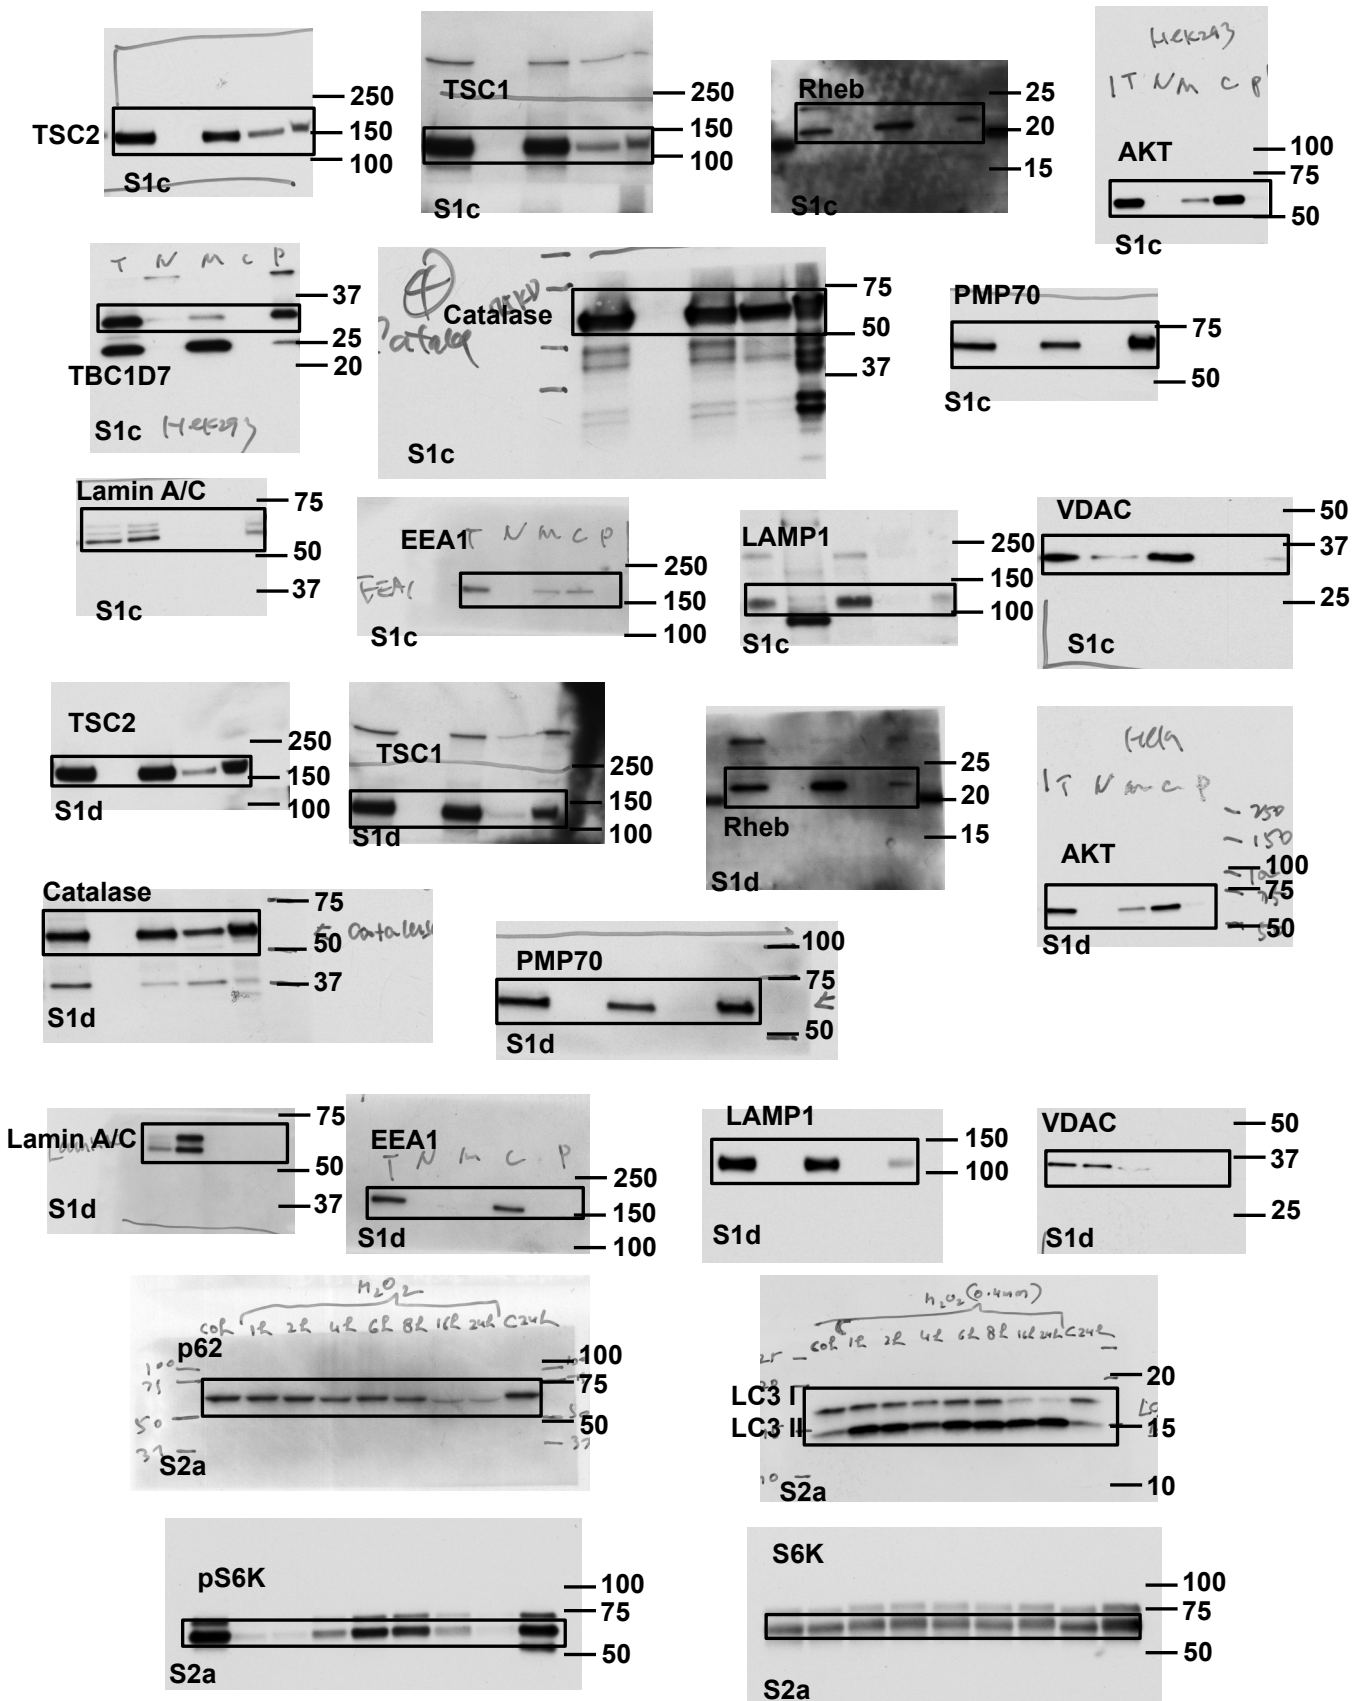

Figure S6 Continued

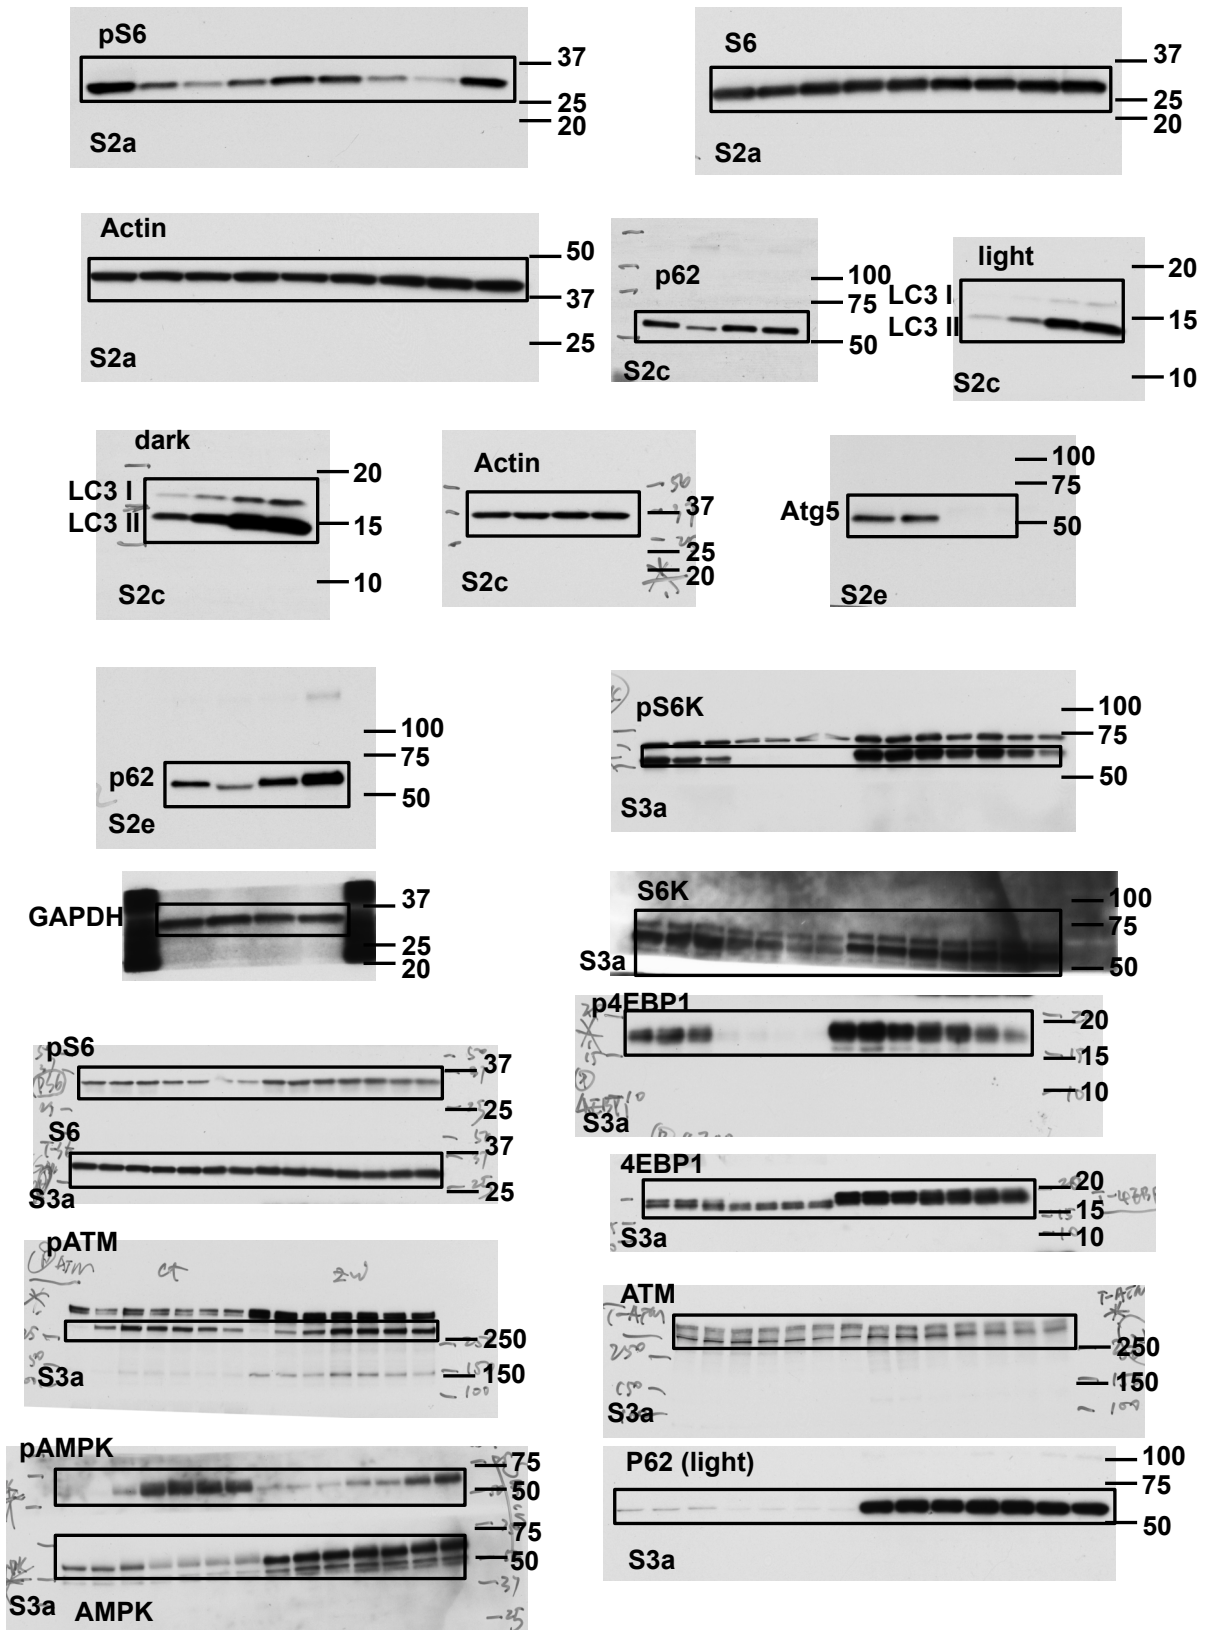

Figure S6 Continued

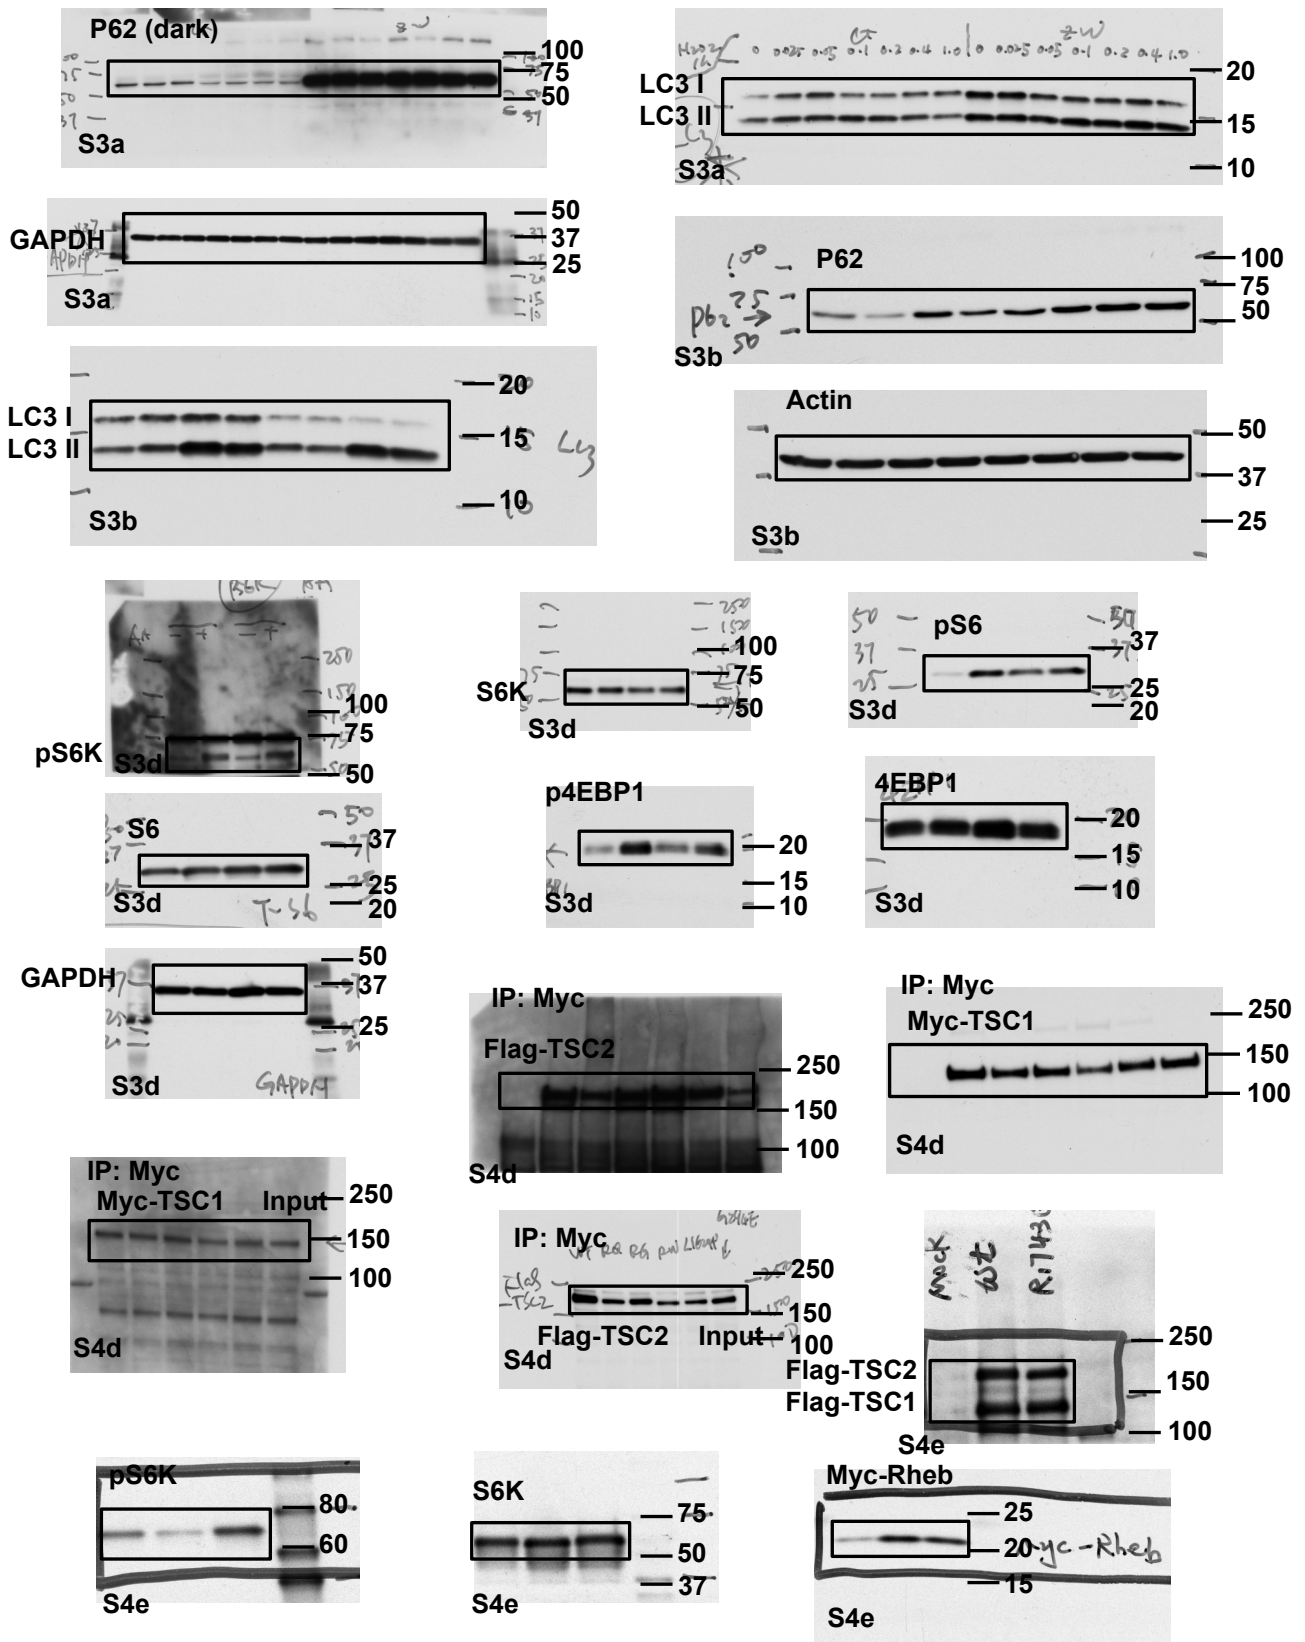

Figure S6 Continued
